# Supplementary material
Source: Elsevier journal article supplement (https://www.sciencedirect.com/science/article/pii/S0025775320308605)
Supplement: mmc1 [file S0025775320308605:mmc1.doc]

Anexo 1: Evaluación de los autores de la puntuación obtenida en el instrumento Agree II por parte de los dos revisores externos.

**Dominio 1: Alcance y Objetivo (rango puntuación: 3-21): Puntuación revisor A: 18; revisor B: 21**

1- El(Los) objetivo(s) general(es) está(n) específicamente escrito(s) ***(Puntuación mínima:1; Máxima:7).*** Puntuación: Revisor A: 6; Revisor B: 7.

El objetivo del documento está descrito correctamente en la introducción, y así lo han valorado los dos revisores.

2- El(Los) aspecto(s) de salud cubierto(s) está(n) específicamente escrito(s). Puntuación: Revisor A: 5; Revisor B: 7

La guía está enfocada especialmente a los aspectos de diagnóstico y tratamiento de los pacientes con déficit de PK, y como tal lo han valorado los revisores.

3.- La población (pacientes, público) a la que se pretende aplicar la guía esta específicamente descrita. Puntuación: Revisor A: 7; Revisor B: 7

La guía está destinada a todos aquellos profesionales que se enfrenten a pacientes con anemias hemolíticas crónicas congénitas que pudieran ser compatibles con déficit de piruvato quinasa, facilitándoles información para el diagnóstico y manejo clínico. Queda claro en el documento y como tal lo han valorado los revisores.

**Dominio 2: Participación de los implicados (rango puntuación: 3-21)**: **Puntuación revisor A: 15; revisor B: 12**

4.- El grupo que desarrolla la guía incluye individuos de todos los grupos profesionales. Puntuación: Revisor A: 7; Revisor B: 5

Se especifica la composición del grupo de trabajo, que incluye hematólogos y un biólogo molecular. No se han incluido revisores expertos o bibliográficos como apunta el revisor B, porque el documente será revisado por los comités científicos de dos sociedades científicas para obtener el aval. A destacar que uno de los autores del documento es editor jefe de una revista científica médica de carácter nacional.

5.- Se han tenido en cuenta los puntos de vista y preferencias de la población diana. Puntuación: Revisor A: 1; Revisor B: 1

Efectivamente, esta es una limitación del documento, no se han incluido asociaciones de pacientes.

6.- Los usuarios diana de la guía están claramente definidos. Puntuación: Revisor A: 7; Revisor B: 6

Los destinatarios están correctamente identificados, y así lo puntúan los dos revisores.

**Dominio 3: Rigor en la elaboración (rango puntuación: 8-56): Puntuación revisor A: 39; revisor B: 33**

7.-Se han utilizado métodos sistemáticos para la búsqueda de la evidencia. Puntuación: Revisor A: 6; Revisor B: 4

En la introducción se incluye la metodología utilizada. El revisor B puntúa mas bajo porque no se han incluido el tiempo utilizado en la estrategia, básicamente por falta de espacio en el texto. La revisión sistemática se hizo en el mes previo a la reunión de noviembre 2019.

8.- Los criterios para seleccionar la evidencia se describen con claridad. Puntuación: Revisor A: 5; Revisor B: 1

Aunque estaba especificada en la introducción inicial, se aclaran en la versión definitiva la sistemática de elección de material para obtención de la evidencia.

9.- Las fortalezas y limitaciones del conjunto de la evidencia están claramente descritas. Puntuación: Revisor A: 5; Revisor B: 1

No está explícitamente especificado en el texto pero se puede deducir que la principal fortaleza viene de los propios miembros del grupo de trabajo que constan como autores y su amplia experiencia en el diagnóstico y manejo de pacientes con anemias. La principal limitación tampoco esta específicamente citada, pero viene derivada del escaso material científico disponible para hacer las recomendaciones ya que se trata de una enfermedad ultrarrara. Esta limitación se discute en la introducción.

10.- Los métodos utilizados para formular las recomendaciones están claramente descritos. Puntuación: Revisor A: 5; Revisor B: 6

Explicados en la introducción.

11.- Al formular las recomendaciones han sido considerados los beneficios en salud, efectos secundarios y los riesgos. Puntuación: Revisor A: 6; Revisor B: 6

Se han considerado riesgos y beneficios, siendo identificado por los revisores.

12- Hay una relación explicita entre cada una de las recomendaciones y las evidencias en las que se basan. Puntuación: Revisor A: 6; Revisor B: 1

Las recomendaciones van referenciadas con la bibliografía correspondiente. Como ya se ha especificado en la introducción, al ser una enfermedad ultrarrara, los niveles de evidencia no se basan en metaánalisis, estudios casos control, etc, porque no hay, lo que explica que el revisor B puntúe bajo éste ítem.

13.- La guía ha sido revisada por expertos externos antes de su publicación. Puntuación: Revisor A: 5; Revisor B: 7

Esta guía ha sido valorada por dos revisores externos y por lo comités científicos de dos sociedades científicas, que han dado su aval.

14.-Se incluye un procedimiento para actualizar la guía. Puntuación: Revisor A: 1; Revisor B: 7

La discrepancia entre los revisores se debe a que, aunque sí que se especifica que se van ha hacer revisiones anuales, no se incluye ningún procedimiento especifico. Los miembros del comité pertenecen al grupo español de Eritropatología, que se reúne de forma periódica cada 6 meses para revisar los proyectos en marcha (entre ellos la revisión de esta guía), por ello no hace falta programar un sistema de reuniones específico.

**Dominio 4: Claridad en la presentación (rango puntuación: 3-21): Puntuación revisor A: 17; revisor B: 17**

15.- Las recomendaciones son específicas y no son ambiguas. Puntuación: Revisor A: 5; Revisor B: 5

Los autores han intentado ser lo más específicos posibles, si bien en la parte de diagnóstico es más difícil por la limitación de espacio y la complejidad de las técnicas, en la parte de tratamiento las recomendaciones son más específicas. Por esta razón la puntuación es de 5.

16. Las distintas opciones para el manejo de la enfermedad se presentan claramente. Puntuación: Revisor A: 6; Revisor B: 6

Se han explicado las diversas opciones de diagnóstico y tratamiento de forma concisa, y como tal lo han valorado los revisores.

17.- Las recomendaciones clave son fácilmente identificables. Puntuación: Revisor A: 6; Revisor B: 6

Los autores han intentado ser concisos y claros en las recomendaciones para cada punto, y como tal lo han valorado los revisores.

**Dominio 5: Aplicabilidad (rango puntuación: 4-28): Puntuación revisor A: 18; revisor B: 11**

18.- La guía describe factores facilitadores y barreras para su aplicación. Puntuación: Revisor A: 5, Revisor B: 1

La guía sí que hace hincapié en las dificultades en la aplicación, especialmente de la parte más sensible que corresponde a las técnicas de diagnóstico, incluyéndose una tabla con las ventajas e inconvenientes de las técnicas diagnósticas. Es cierto (y de ahí la puntuación baja de un revisor) que no se ha incluido una reflexión económica/logística sobre las dificultades de implantación de estas técnicas, por motivos de espacio. La parte de terapéutica no supone ninguna complicación ya que incluye recomendaciones (transfusión, quelación y cirugía) que se realizan de forma rutinaria en los servicios de hematología (incluyendo el transplante hematopoyético), pediatría o medicina interna. Se especifica que otras aproximaciones (nuevos fármacos y terapia génica) se encuentran en fase de ensayo clínico.

19.- La guía proporciona consejo y/o herramientas sobre cómo las recomendaciones pueden ser llevadas a la práctica. Puntuación: Revisor A: 5; Revisor B: 3

No se ha considerado que se precisen mayores aclaraciones a este punto ya que las recomendaciones de tratamiento se realizan ya en la práctica clínica. Para los revisores las recomendaciones son intermedias.

20.- Se han considerado las posibles implicaciones de las aplicaciones de las recomendaciones sobre los recursos. Puntuación: Revisor A: 5; Revisor B: 2

Se han considerado, especialmente en el apartado de diagnóstico, recomendando el uso de técnicas de NGS como primera opción. La realización de esta recomendación por parte de un grupo experto tiene la intención de favorecer y fomentar el uso de estas técnicas de forma generalizada a niveles asistencial, que se utiliza de forma amplia en el campo de la oncohematología pero está menos desarrollado en el de la eritropatología. No se ha incluido una reflexión sobre el coste y la logística que esto supone en los Servicios de Hematología por cuestión de espacio, por ello uno de los revisores puntúa más bajo.

21.- La guía ofrece criterios para la monitorización y/o auditoria. Puntuación: Revisor A: 3; Revisor B: 5

Se incluye en la introducción que se hará seguimiento anual por parte del grupo de las actualizaciones en el tema por si hubiera que hacer actualizaciones. Si bien, no describe en el texto por limitación de espacio, los miembros del grupo de eritropatología y en especial de este comité se reúnen de forma periódica. En las reuniones extraordinarias anuales se incluirá la revisión del documento y si hubiera que corregir algún punto, se escribirá una carta al editor.

**Dominio 6: Independencia editorial (rango puntuación: 2-14): Puntuación revisor A: 13; revisor B: 14**

22.- Los puntos de vista de la entidad financiadora no han influido en el contenido de la guía. Puntuación: Revisor A: 7; Revisor B: 7

La colaboración de la empresa farmacéutica se ha limitado a favorecer las reuniones del grupo de trabajo y no ha interferido en ningún momento en el contenido del documento.

23.- Se han registrado y abordado los conflictos de interés de los miembros del grupo evaluador de la guía. Puntuación: Revisor A: 6; Revisor B: 7

Los autores no tienen conflicto de interés y queda registrado en el documento

**Puntuación global de la guía (rango puntuación 1-7): Puntuación Revisor A: 6; Revisor B: 5**

**Recomendación de la guía para su uso (SI/NO):**

Ambos revisores recomiendan el uso de esta guía
